# Supplementary material for: Dispersedly embedded loading of Fe3O4nanoparticles into graphene nanosheets for highly efficient and recyclable removal of heavy metal ions
Source: Royal Society of Chemistry journal article supplement (doi:10.1039/c5nj00897b), 2015-01-01
Supplement: c5nj00897b1.pdf [file c5nj00897b1.pdf]

## Supporting Information

### **Dispersedly Embedded loading of Fe<sub>3</sub>O<sub>4</sub> Nanoparticles into Graphene Nanosheets for Highly Efficient and Recyclable Removal of Heavy Metal Ions**

Gang zhou,<sup>a</sup> Xiaoyong Xu,<sup>\*ab</sup> Wenchang Zhu,<sup>a</sup> Bing Feng,<sup>a</sup> and Jingguo Hu<sup>\*a</sup>

<sup>a</sup> *School of physics Science and Technology, Yangzhou University, Yangzhou 225002, China*

<sup>b</sup> *State Key Laboratory of Bioelectronics, Southeast University, Nanjing 210096, China.*

\* To whom correspondence should be addressed.

E-mail: xxy@yzu.edu.cn (X. Xu) and jghu@yzu.edu.cn (J. Hu).

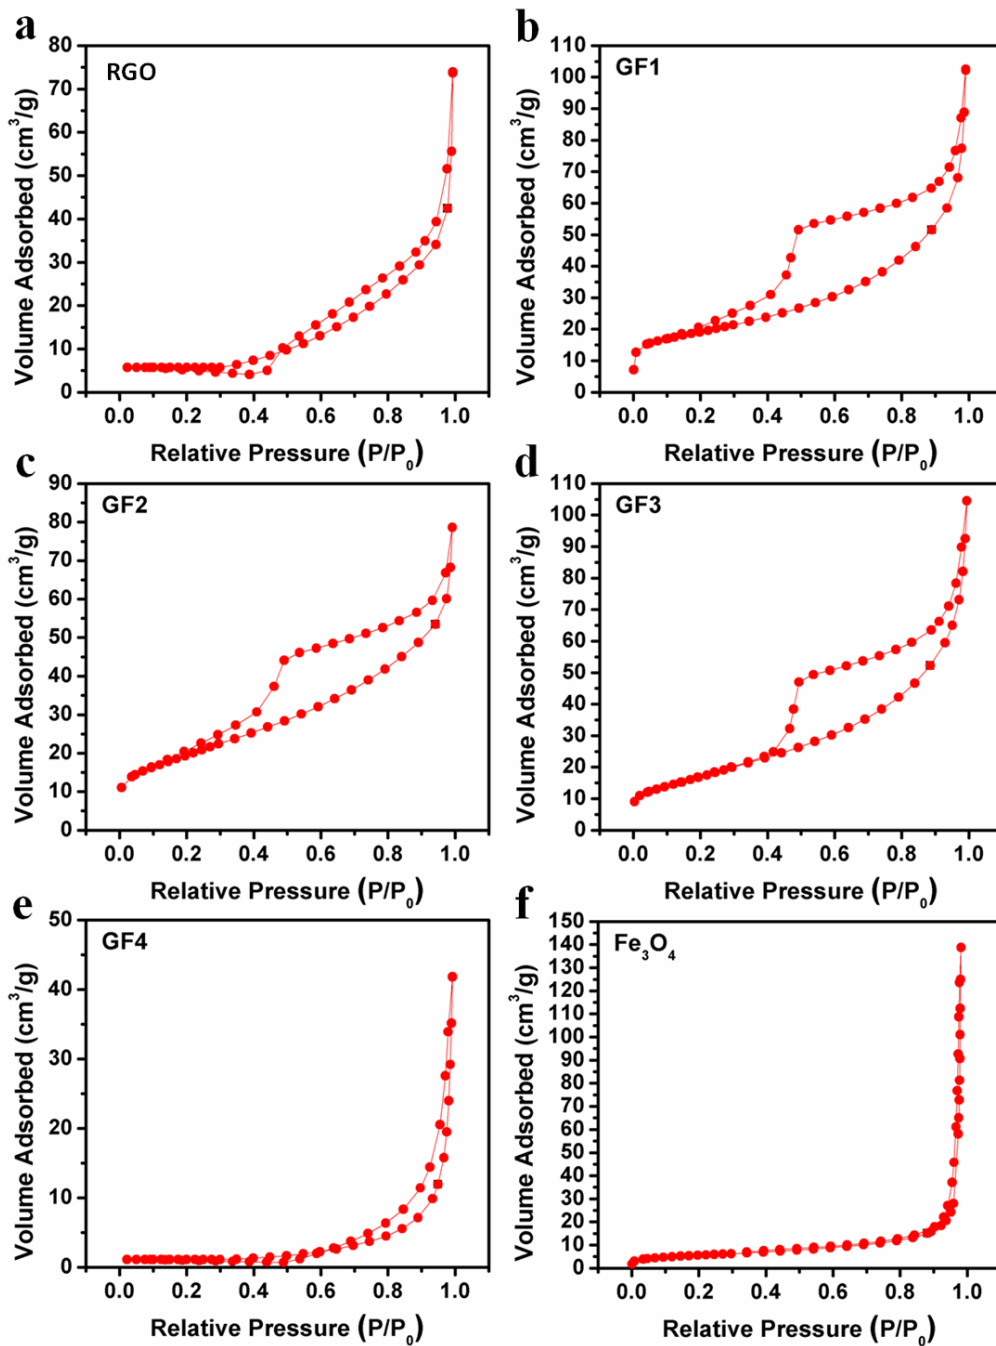

**Fig. S1** Nitrogen adsorption–desorption curves of (a) pure RGO NSs, (b) GF1, (c) GF2, (d) GF3, (e) GF4 and (f) pure Fe<sub>3</sub>O<sub>4</sub> NPs.

Specific surface areas of different samples are evaluated by nitrogen adsorption–desorption curves, as shown in Figs. S1(a)–(f). The specific surface areas, namely BET areas, are 25.03 m<sup>2</sup>/g, 98.79 m<sup>2</sup>/g, 109.95 m<sup>2</sup>/g, 96.11 m<sup>2</sup>/g, 4.75 m<sup>2</sup>/g and 30.13 m<sup>2</sup>/g for RGO, GF1, GF2, GF3, GF4 and Fe<sub>3</sub>O<sub>4</sub>, respectively.

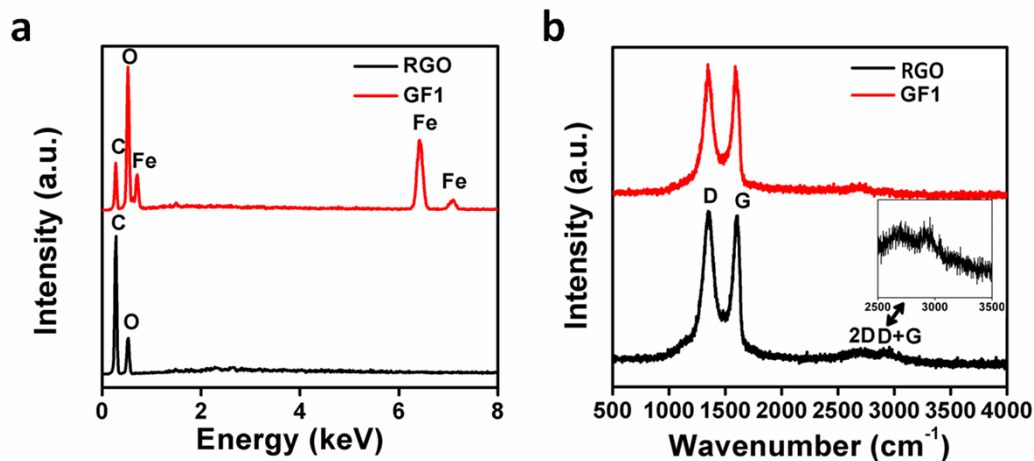

**Fig. S2** (a) EDS spectra and (b) RS spectra of pure RGO NSs and GF1. The insets show the amplified 2D band with the D+G combination band of pure RGO NSs.

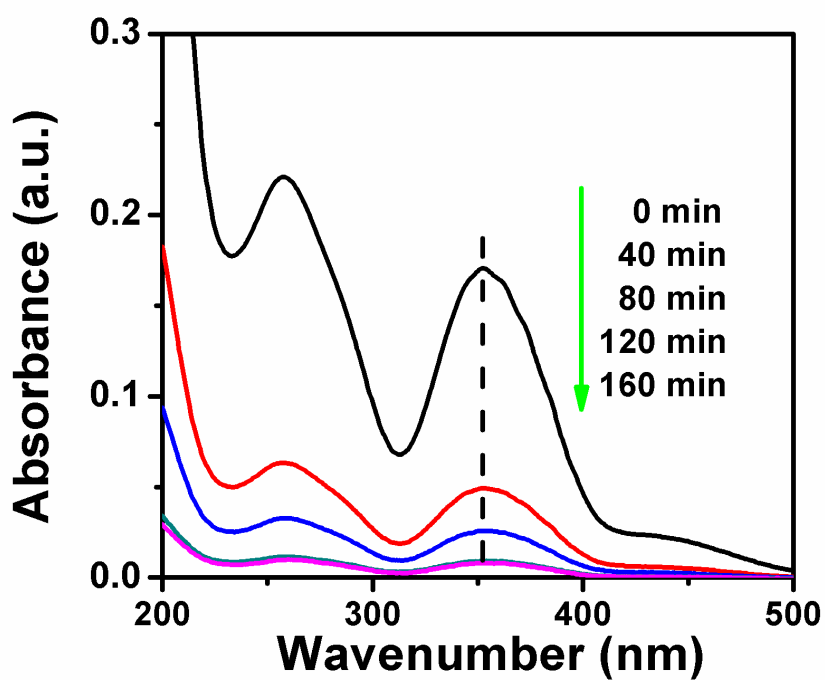

**Fig. S3** UV-vis absorption spectra of Cr(VI) solutions treated with GF2 at different adsorption times for the adsorption kinetics study.

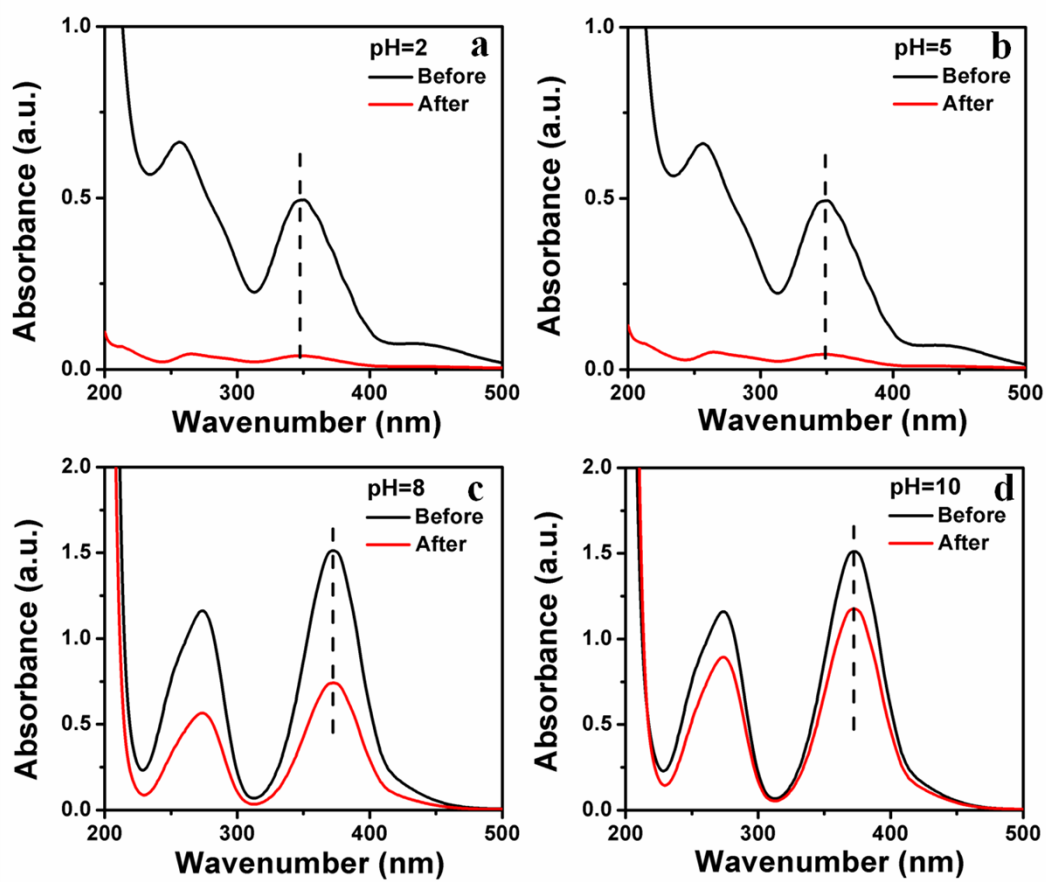

**Fig. S4** UV-vis absorption spectra of Cr(VI) solutions with different pH values of (a) 2, (b) 5, (c) 8 and (d) 10 before and after treated with GF2 for 20 min.

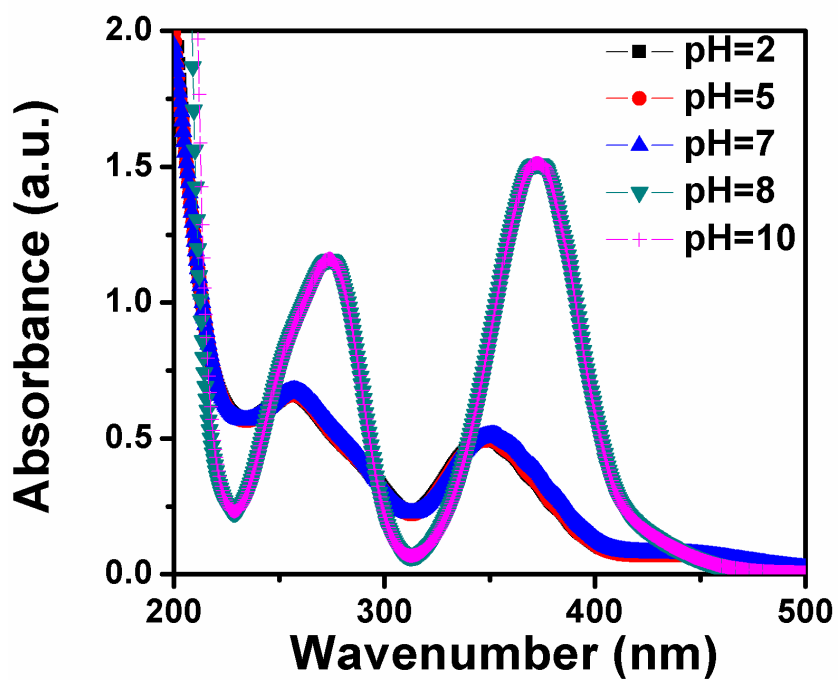

**Fig. S5** UV-vis absorption spectra of the initial Cr(VI) solutions with different pH values.

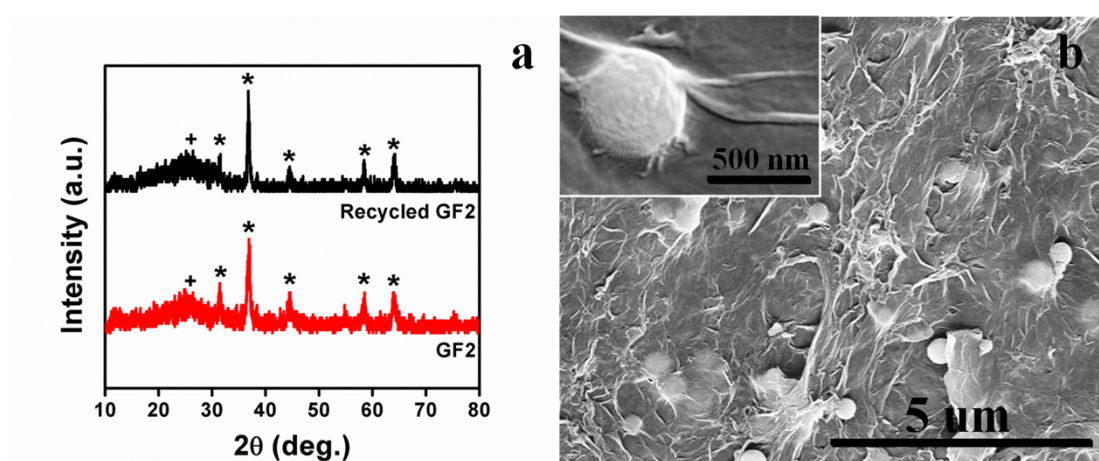

**Fig. S6** (a) XRD patterns (RGO: +,  $\text{Fe}_3\text{O}_4$ : \*) and (b) FESEM image of the recycled GF2. The inset shows a locally amplified FESEM image.

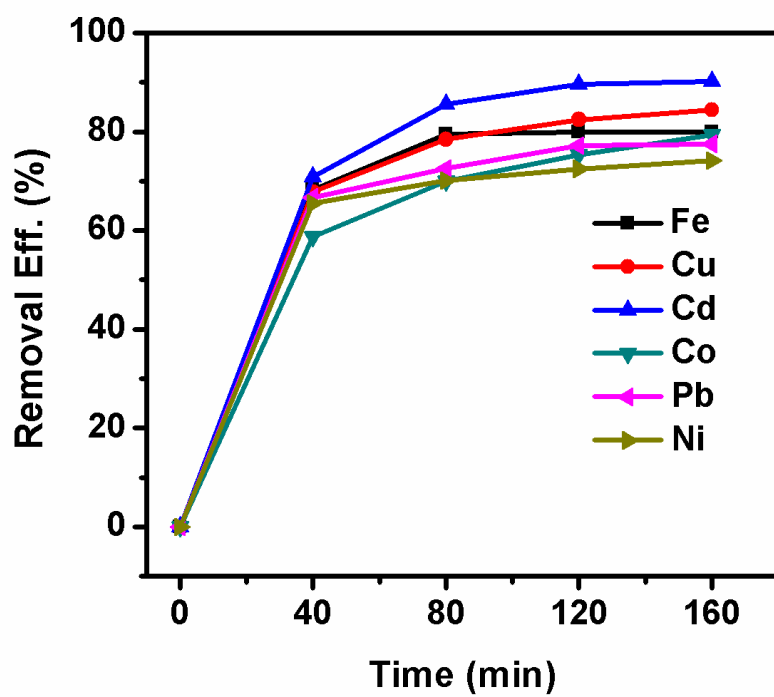

**Fig. S7** Effect of time on adsorption behavior of Fe(III), Cu(II), Cd(II), Co(II), Pb(II) and Ni(II).
